# Supplementary material
Source: publisher figshare collection journal article supplement (https://acs.figshare.com/ndownloader/files/4742875)
Supplement: Supplementary file 1 [file 4742875]

data_sd01ru

#SDPR1 in paper
#Note to referee- checkcif output is under refine special details.
 
_audit_creation_method            SHELXL-97
_chemical_name_systematic
;
 ?
;
_chemical_name_common             ?
_chemical_melting_point           ?
_chemical_formula_moiety          'C21 H23 Cl N3 Ru, F6 P'
_chemical_formula_sum
 'C21 H23 Cl F6 N3 P Ru'
_chemical_formula_weight          598.91
 
loop_
 _atom_type_symbol
 _atom_type_description
 _atom_type_scat_dispersion_real
 _atom_type_scat_dispersion_imag
 _atom_type_scat_source
 'C'  'C'   0.0033   0.0016
 'International Tables Vol C Tables 4.2.6.8 and 6.1.1.4'
 'H'  'H'   0.0000   0.0000
 'International Tables Vol C Tables 4.2.6.8 and 6.1.1.4'
 'Cl'  'Cl'   0.1484   0.1585
 'International Tables Vol C Tables 4.2.6.8 and 6.1.1.4'
 'F'  'F'   0.0171   0.0103
 'International Tables Vol C Tables 4.2.6.8 and 6.1.1.4'
 'N'  'N'   0.0061   0.0033
 'International Tables Vol C Tables 4.2.6.8 and 6.1.1.4'
 'P'  'P'   0.1023   0.0942
 'International Tables Vol C Tables 4.2.6.8 and 6.1.1.4'
 'Ru'  'Ru'  -1.2594   0.8363
 'International Tables Vol C Tables 4.2.6.8 and 6.1.1.4'
 
_symmetry_cell_setting            Triclinic
_symmetry_space_group_name_H-M    P-1
_symmetry_space_group_name_Hall   '-P1' 
loop_
 _symmetry_equiv_pos_as_xyz
 'x, y, z'
 '-x, -y, -z'
 
_cell_length_a                    9.1789(10)
_cell_length_b                    9.7628(11)
_cell_length_c                    13.0987(14)
_cell_angle_alpha                 84.6880(10)
_cell_angle_beta                  72.951(2)
_cell_angle_gamma                 89.7950(10)
_cell_volume                      1117.1(2)
_cell_formula_units_Z             2
_cell_measurement_temperature     150(2)
_cell_measurement_reflns_used     4522
_cell_measurement_theta_min       2.4145
_cell_measurement_theta_max       28.6685
 
_exptl_crystal_description        Block
_exptl_crystal_colour             'Dark Green'
_exptl_crystal_size_max           0.23
_exptl_crystal_size_mid           0.22
_exptl_crystal_size_min           0.18
_exptl_crystal_density_meas       ?
_exptl_crystal_density_diffrn     1.781
_exptl_crystal_density_method     'not measured'
_exptl_crystal_F_000              600
_exptl_absorpt_coefficient_mu     0.958
_exptl_absorpt_correction_type    multiscan
_exptl_absorpt_correction_T_min   0.538
_exptl_absorpt_correction_T_max   0.452
_exptl_absorpt_process_details    'SADABS - Bruker Nonius'
 
_exptl_special_details
;
 ?
;
 
_diffrn_ambient_temperature       150(2)
_diffrn_radiation_wavelength      0.71073
_diffrn_radiation_type            MoK\a
_diffrn_radiation_source          'fine-focus sealed tube'
_diffrn_radiation_monochromator   graphite
_diffrn_measurement_device_type   'CCD Area Detector'
_diffrn_measurement_method        '\w scans'
_diffrn_detector_area_resol_mean  ?
_diffrn_standards_number          0
_diffrn_standards_interval_count  ?
_diffrn_standards_interval_time   ?
_diffrn_standards_decay_%         0
_diffrn_reflns_number             5695
_diffrn_reflns_av_R_equivalents   0.0188
_diffrn_reflns_av_sigmaI/netI     0.0378
_diffrn_reflns_limit_h_min        -10
_diffrn_reflns_limit_h_max        10
_diffrn_reflns_limit_k_min        -11
_diffrn_reflns_limit_k_max        11
_diffrn_reflns_limit_l_min        -14
_diffrn_reflns_limit_l_max        15
_diffrn_reflns_theta_min          1.63
_diffrn_reflns_theta_max          25.00
_reflns_number_total              3651
_reflns_number_gt                 3499
_reflns_threshold_expression      >2sigma(I)
 
_computing_data_collection        'Bruker XSCANS'
_computing_cell_refinement        'Bruker XSCANS'
_computing_data_reduction         'Bruker SHELXTL'
_computing_structure_solution     'SHELXS-97 (Sheldrick, 1990)'
_computing_structure_refinement   'SHELXL-97 (Sheldrick, 1997)'
_computing_molecular_graphics     'Bruker SHELXTL'
_computing_publication_material   'Bruker SHELXTL'
 
_refine_special_details
;
 
No problems encountered during refinement. 
 
Checkcif output: 
 
029_ALERT_3_A _diffrn_measured_fraction_theta_full Low .......       0.93
911_ALERT_3_B # Missing FCF Refl. Between TH(Min) & STH/L=0.6         279
022_ALERT_3_C Ratio Unique / Expected Reflections too Low ....       0.93

93% completeness is suitable for structure analysis aimed at establishing 
connectivity. The relatively low value is owed to the orientation
of the crystal during data collection.

761_ALERT_1_A CIF Contains no X-H Bonds ......................          ?
762_ALERT_1_A CIF Contains no X-Y-H or H-Y-H Angles ..........          ?

No action: H atoms were placed geometrically.


061_ALERT_3_B Tmax/Tmin Range Test RR' too Large .............       0.56

Sadabs corrects for all systematic errors that lead to disparities in the 
intensities of symmetry-equivalent data. These may include absorption by the 
mount, crystal decay, changes in the volume of the crystal illuminated, etc.  


244_ALERT_4_C Low   'Solvent' Ueq as Compared to Neighbors for         P1

Normal for PF6-


380_ALERT_4_C Check Incorrectly? Oriented X(sp2)-Methyl Moiety        C11
795_ALERT_4_C C-Atom in CIF Coordinate List out of Sequence ..        C21

No action 
 
;
 
_refine_ls_structure_factor_coef  Fsqd
_refine_ls_matrix_type            full
_refine_ls_weighting_scheme       calc
_refine_ls_weighting_details
 'calc w=1/[\s^2^(Fo^2^)+(0.0353P)^2^+1.4263P] where P=(Fo^2^+2Fc^2^)/3'
_atom_sites_solution_primary      direct
_atom_sites_solution_secondary    difmap
_atom_sites_solution_hydrogens    geom
_refine_ls_hydrogen_treatment     riding
_refine_ls_extinction_method      none
_refine_ls_extinction_coef        ?
_refine_ls_number_reflns          3651
_refine_ls_number_parameters      298
_refine_ls_number_restraints      0
_refine_ls_R_factor_all           0.0369
_refine_ls_R_factor_gt            0.0350
_refine_ls_wR_factor_ref          0.0872
_refine_ls_wR_factor_gt           0.0859
_refine_ls_goodness_of_fit_ref    1.143
_refine_ls_restrained_S_all       1.143
_refine_ls_shift/su_max           0.001
_refine_ls_shift/su_mean          0.000
 
loop_
 _atom_site_label
 _atom_site_type_symbol
 _atom_site_fract_x
 _atom_site_fract_y
 _atom_site_fract_z
 _atom_site_U_iso_or_equiv
 _atom_site_adp_type
 _atom_site_occupancy
 _atom_site_symmetry_multiplicity
 _atom_site_calc_flag
 _atom_site_refinement_flags
 _atom_site_disorder_assembly
 _atom_site_disorder_group
Ru1 Ru 0.11084(3) 0.28616(3) 0.74489(2) 0.01682(11) Uani 1 1 d . . .
Cl1 Cl 0.06932(11) 0.41792(9) 0.59501(7) 0.0259(2) Uani 1 1 d . . .
C11 C -0.2363(5) 0.4361(4) 0.8143(4) 0.0334(10) Uani 1 1 d . . .
H11A H -0.3173 0.4569 0.8782 0.050 Uiso 1 1 calc R . .
H11B H -0.2777 0.3765 0.7727 0.050 Uiso 1 1 calc R . .
H11C H -0.1961 0.5219 0.7700 0.050 Uiso 1 1 calc R . .
C12 C -0.1107(4) 0.3642(4) 0.8476(3) 0.0250(8) Uani 1 1 d . . .
C13 C 0.0144(4) 0.4419(4) 0.8591(3) 0.0238(8) Uani 1 1 d . . .
H13A H 0.0268 0.5419 0.8329 0.029 Uiso 1 1 calc R . .
C14 C -0.1106(4) 0.2200(4) 0.8655(3) 0.0249(8) Uani 1 1 d . . .
H14A H -0.1853 0.1638 0.8437 0.030 Uiso 1 1 calc R . .
C15 C 0.1326(4) 0.3750(4) 0.8897(3) 0.0220(8) Uani 1 1 d . . .
H15A H 0.2274 0.4291 0.8843 0.026 Uiso 1 1 calc R . .
C16 C 0.0128(4) 0.1540(4) 0.8931(3) 0.0218(8) Uani 1 1 d . . .
H16A H 0.0210 0.0520 0.8914 0.026 Uiso 1 1 calc R . .
C17 C 0.1328(4) 0.2286(4) 0.9094(3) 0.0206(8) Uani 1 1 d . . .
C18 C 0.2531(4) 0.1558(4) 0.9523(3) 0.0254(8) Uani 1 1 d . . .
H18A H 0.2388 0.0545 0.9511 0.031 Uiso 1 1 calc R . .
C19 C 0.2211(5) 0.1853(5) 1.0694(3) 0.0349(10) Uani 1 1 d . . .
H19A H 0.1151 0.1596 1.1088 0.052 Uiso 1 1 calc R . .
H19B H 0.2384 0.2836 1.0726 0.052 Uiso 1 1 calc R . .
H19C H 0.2895 0.1317 1.1018 0.052 Uiso 1 1 calc R . .
C110 C 0.4166(5) 0.1951(5) 0.8885(4) 0.0384(11) Uani 1 1 d . . .
H11D H 0.4342 0.1756 0.8138 0.058 Uiso 1 1 calc R . .
H11E H 0.4865 0.1416 0.9195 0.058 Uiso 1 1 calc R . .
H11F H 0.4347 0.2935 0.8909 0.058 Uiso 1 1 calc R . .
C21 C 0.5373(4) 0.2090(4) 0.5265(3) 0.0264(9) Uani 1 1 d . . .
H21A H 0.5708 0.1377 0.4809 0.032 Uiso 1 1 calc R . .
C22 C 0.6351(5) 0.3156(4) 0.5282(3) 0.0291(9) Uani 1 1 d . . .
H22A H 0.7379 0.3181 0.4840 0.035 Uiso 1 1 calc R . .
C23 C 0.5830(4) 0.4177(4) 0.5940(3) 0.0245(8) Uani 1 1 d . . .
H23A H 0.6495 0.4913 0.5955 0.029 Uiso 1 1 calc R . .
C24 C 0.4325(4) 0.4132(4) 0.6585(3) 0.0224(8) Uani 1 1 d . . .
H24A H 0.3965 0.4853 0.7027 0.027 Uiso 1 1 calc R . .
N25 N 0.3371(3) 0.3089(3) 0.6593(2) 0.0187(6) Uani 1 1 d . . .
C26 C 0.3896(4) 0.2095(4) 0.5930(3) 0.0212(8) Uani 1 1 d . . .
N27 N 0.2845(4) 0.1076(3) 0.5905(2) 0.0219(7) Uani 1 1 d . . .
N28 N 0.1512(3) 0.1271(3) 0.6519(2) 0.0179(6) Uani 1 1 d . . .
C29 C 0.0387(4) 0.0269(4) 0.6487(3) 0.0198(8) Uani 1 1 d . . .
C210 C 0.0759(4) -0.1101(4) 0.6431(3) 0.0242(8) Uani 1 1 d . . .
H21B H 0.1753 -0.1391 0.6418 0.029 Uiso 1 1 calc R . .
C211 C -0.0347(5) -0.2043(4) 0.6393(3) 0.0292(9) Uani 1 1 d . . .
H21C H -0.0112 -0.2989 0.6359 0.035 Uiso 1 1 calc R . .
C212 C -0.1787(5) -0.1617(4) 0.6405(3) 0.0299(9) Uani 1 1 d . . .
H21D H -0.2538 -0.2269 0.6379 0.036 Uiso 1 1 calc R . .
C213 C -0.2134(5) -0.0248(4) 0.6453(3) 0.0295(9) Uani 1 1 d . . .
H21E H -0.3124 0.0040 0.6455 0.035 Uiso 1 1 calc R . .
C214 C -0.1058(4) 0.0715(4) 0.6499(3) 0.0252(8) Uani 1 1 d . . .
H21F H -0.1301 0.1659 0.6537 0.030 Uiso 1 1 calc R . .
P1 P 0.65020(12) 0.23336(10) 0.17465(8) 0.0261(2) Uani 1 1 d . . .
F11 F 0.7074(4) 0.3531(3) 0.0798(2) 0.0530(7) Uani 1 1 d . . .
F12 F 0.4967(3) 0.3139(3) 0.2175(2) 0.0533(8) Uani 1 1 d . . .
F13 F 0.7254(3) 0.3156(2) 0.2478(2) 0.0383(6) Uani 1 1 d . . .
F14 F 0.5786(3) 0.1527(3) 0.1007(2) 0.0507(7) Uani 1 1 d . . .
F15 F 0.8065(3) 0.1557(3) 0.1323(2) 0.0492(7) Uani 1 1 d . . .
F16 F 0.5932(3) 0.1154(3) 0.2704(2) 0.0527(7) Uani 1 1 d . . .
 
loop_
 _atom_site_aniso_label
 _atom_site_aniso_U_11
 _atom_site_aniso_U_22
 _atom_site_aniso_U_33
 _atom_site_aniso_U_23
 _atom_site_aniso_U_13
 _atom_site_aniso_U_12
Ru1 0.01507(18) 0.01817(17) 0.01544(17) -0.00257(11) -0.00144(12) -0.00007(12)
Cl1 0.0293(5) 0.0248(5) 0.0220(5) 0.0017(4) -0.0061(4) 0.0018(4)
C11 0.020(2) 0.041(2) 0.035(2) -0.0008(19) -0.0025(18) 0.0042(19)
C12 0.019(2) 0.034(2) 0.0175(19) -0.0042(16) 0.0029(15) 0.0032(17)
C13 0.024(2) 0.0229(19) 0.021(2) -0.0094(15) 0.0020(16) 0.0055(16)
C14 0.017(2) 0.035(2) 0.020(2) -0.0055(16) -0.0002(15) -0.0057(16)
C15 0.019(2) 0.028(2) 0.0159(18) -0.0075(15) 0.0019(15) -0.0031(16)
C16 0.026(2) 0.0211(18) 0.0137(18) -0.0005(14) 0.0016(15) -0.0026(16)
C17 0.021(2) 0.0263(19) 0.0113(17) -0.0020(14) 0.0011(14) -0.0006(16)
C18 0.026(2) 0.029(2) 0.021(2) -0.0021(16) -0.0060(17) 0.0011(17)
C19 0.038(3) 0.043(2) 0.025(2) -0.0028(19) -0.0112(19) 0.001(2)
C110 0.026(2) 0.053(3) 0.034(2) 0.004(2) -0.0066(19) 0.004(2)
C21 0.019(2) 0.028(2) 0.027(2) -0.0077(16) 0.0022(16) 0.0043(16)
C22 0.019(2) 0.032(2) 0.030(2) -0.0056(17) 0.0029(17) -0.0017(17)
C23 0.021(2) 0.0252(19) 0.026(2) 0.0001(16) -0.0053(16) -0.0046(16)
C24 0.023(2) 0.0196(18) 0.023(2) -0.0035(15) -0.0028(16) -0.0002(16)
N25 0.0183(17) 0.0193(15) 0.0169(15) -0.0013(12) -0.0028(13) 0.0001(13)
C26 0.021(2) 0.0229(18) 0.0176(19) -0.0013(15) -0.0032(15) 0.0013(15)
N27 0.0202(17) 0.0233(16) 0.0197(16) -0.0033(13) -0.0018(13) 0.0004(13)
N28 0.0162(16) 0.0193(15) 0.0165(15) -0.0006(12) -0.0026(12) -0.0013(12)
C29 0.022(2) 0.0214(18) 0.0146(18) -0.0023(14) -0.0023(15) -0.0027(15)
C210 0.024(2) 0.027(2) 0.0173(19) -0.0044(15) 0.0010(15) 0.0000(16)
C211 0.035(2) 0.0222(19) 0.024(2) -0.0041(16) 0.0031(18) -0.0069(17)
C212 0.030(2) 0.034(2) 0.025(2) -0.0010(17) -0.0056(18) -0.0156(18)
C213 0.027(2) 0.038(2) 0.025(2) -0.0007(17) -0.0104(18) -0.0040(18)
C214 0.027(2) 0.027(2) 0.023(2) -0.0040(16) -0.0092(17) 0.0015(17)
P1 0.0229(6) 0.0267(5) 0.0278(6) -0.0062(4) -0.0049(4) 0.0008(4)
F11 0.073(2) 0.0425(15) 0.0362(15) 0.0023(12) -0.0068(14) -0.0131(14)
F12 0.0300(15) 0.0626(18) 0.066(2) -0.0173(15) -0.0091(14) 0.0180(14)
F13 0.0427(15) 0.0359(13) 0.0423(15) -0.0188(11) -0.0174(12) 0.0058(11)
F14 0.0616(19) 0.0398(15) 0.0692(19) -0.0163(13) -0.0445(17) 0.0039(13)
F15 0.0331(15) 0.0579(17) 0.0605(18) -0.0328(14) -0.0119(13) 0.0160(13)
F16 0.0594(19) 0.0455(16) 0.0493(17) 0.0115(13) -0.0144(15) -0.0151(14)
 
_geom_special_details
;
 All esds (except the esd in the dihedral angle between two l.s. planes)
 are estimated using the full covariance matrix.  The cell esds are taken
 into account individually in the estimation of esds in distances, angles
 and torsion angles; correlations between esds in cell parameters are only
 used when they are defined by crystal symmetry.  An approximate (isotropic)
 treatment of cell esds is used for estimating esds involving l.s. planes.
;
 
loop_
 _geom_bond_atom_site_label_1
 _geom_bond_atom_site_label_2
 _geom_bond_distance
 _geom_bond_site_symmetry_2
 _geom_bond_publ_flag
Ru1 N28 2.028(3) . ?
Ru1 N25 2.052(3) . ?
Ru1 C16 2.182(4) . ?
Ru1 C15 2.218(3) . ?
Ru1 C13 2.229(3) . ?
Ru1 C14 2.232(4) . ?
Ru1 C17 2.243(3) . ?
Ru1 C12 2.259(4) . ?
Ru1 Cl1 2.3711(9) . ?
C11 C12 1.499(5) . ?
C12 C14 1.406(5) . ?
C12 C13 1.430(5) . ?
C13 C15 1.401(5) . ?
C14 C16 1.422(5) . ?
C15 C17 1.429(5) . ?
C16 C17 1.401(5) . ?
C17 C18 1.524(5) . ?
C18 C110 1.520(6) . ?
C18 C19 1.529(5) . ?
C21 C26 1.381(5) . ?
C21 C22 1.383(6) . ?
C22 C23 1.371(5) . ?
C23 C24 1.390(5) . ?
C24 N25 1.343(5) . ?
N25 C26 1.354(5) . ?
C26 N27 1.398(5) . ?
N27 N28 1.277(4) . ?
N28 C29 1.436(4) . ?
C29 C210 1.383(5) . ?
C29 C214 1.391(5) . ?
C210 C211 1.387(5) . ?
C211 C212 1.380(6) . ?
C212 C213 1.376(6) . ?
C213 C214 1.383(5) . ?
P1 F14 1.584(3) . ?
P1 F16 1.589(3) . ?
P1 F12 1.590(3) . ?
P1 F11 1.593(3) . ?
P1 F15 1.595(3) . ?
P1 F13 1.604(2) . ?
 
loop_
 _geom_angle_atom_site_label_1
 _geom_angle_atom_site_label_2
 _geom_angle_atom_site_label_3
 _geom_angle
 _geom_angle_site_symmetry_1
 _geom_angle_site_symmetry_3
 _geom_angle_publ_flag
N28 Ru1 N25 75.37(11) . . ?
N28 Ru1 C16 93.80(12) . . ?
N25 Ru1 C16 126.92(13) . . ?
N28 Ru1 C15 148.14(13) . . ?
N25 Ru1 C15 95.99(12) . . ?
C16 Ru1 C15 66.61(13) . . ?
N28 Ru1 C13 167.41(13) . . ?
N25 Ru1 C13 117.22(13) . . ?
C16 Ru1 C13 78.92(14) . . ?
C15 Ru1 C13 36.73(14) . . ?
N28 Ru1 C14 101.73(13) . . ?
N25 Ru1 C14 164.45(13) . . ?
C16 Ru1 C14 37.55(14) . . ?
C15 Ru1 C14 78.36(14) . . ?
C13 Ru1 C14 66.26(14) . . ?
N28 Ru1 C17 112.83(12) . . ?
N25 Ru1 C17 99.72(12) . . ?
C16 Ru1 C17 36.89(13) . . ?
C15 Ru1 C17 37.36(13) . . ?
C13 Ru1 C17 67.04(13) . . ?
C14 Ru1 C17 66.97(13) . . ?
N28 Ru1 C12 130.42(13) . . ?
N25 Ru1 C12 152.80(13) . . ?
C16 Ru1 C12 66.95(14) . . ?
C15 Ru1 C12 66.57(14) . . ?
C13 Ru1 C12 37.16(14) . . ?
C14 Ru1 C12 36.48(14) . . ?
C17 Ru1 C12 79.27(13) . . ?
N28 Ru1 Cl1 86.21(8) . . ?
N25 Ru1 Cl1 84.57(8) . . ?
C16 Ru1 Cl1 147.48(10) . . ?
C15 Ru1 Cl1 124.03(10) . . ?
C13 Ru1 Cl1 94.42(10) . . ?
C14 Ru1 Cl1 110.65(10) . . ?
C17 Ru1 Cl1 160.96(10) . . ?
C12 Ru1 Cl1 88.45(10) . . ?
C14 C12 C13 118.6(3) . . ?
C14 C12 C11 121.2(4) . . ?
C13 C12 C11 120.2(3) . . ?
C14 C12 Ru1 70.7(2) . . ?
C13 C12 Ru1 70.3(2) . . ?
C11 C12 Ru1 129.3(3) . . ?
C15 C13 C12 120.4(3) . . ?
C15 C13 Ru1 71.2(2) . . ?
C12 C13 Ru1 72.5(2) . . ?
C12 C14 C16 120.1(3) . . ?
C12 C14 Ru1 72.8(2) . . ?
C16 C14 Ru1 69.3(2) . . ?
C13 C15 C17 121.5(3) . . ?
C13 C15 Ru1 72.1(2) . . ?
C17 C15 Ru1 72.3(2) . . ?
C17 C16 C14 122.0(3) . . ?
C17 C16 Ru1 73.9(2) . . ?
C14 C16 Ru1 73.1(2) . . ?
C16 C17 C15 117.2(3) . . ?
C16 C17 C18 120.8(3) . . ?
C15 C17 C18 121.9(3) . . ?
C16 C17 Ru1 69.2(2) . . ?
C15 C17 Ru1 70.4(2) . . ?
C18 C17 Ru1 134.4(3) . . ?
C110 C18 C17 114.6(3) . . ?
C110 C18 C19 111.0(3) . . ?
C17 C18 C19 107.4(3) . . ?
C26 C21 C22 117.9(4) . . ?
C23 C22 C21 119.6(4) . . ?
C22 C23 C24 119.8(4) . . ?
N25 C24 C23 121.2(3) . . ?
C24 N25 C26 118.3(3) . . ?
C24 N25 Ru1 127.2(2) . . ?
C26 N25 Ru1 114.4(2) . . ?
N25 C26 C21 123.1(3) . . ?
N25 C26 N27 116.8(3) . . ?
C21 C26 N27 120.0(3) . . ?
N28 N27 C26 112.3(3) . . ?
N27 N28 C29 114.0(3) . . ?
N27 N28 Ru1 121.0(2) . . ?
C29 N28 Ru1 125.0(2) . . ?
C210 C29 C214 121.5(3) . . ?
C210 C29 N28 120.0(3) . . ?
C214 C29 N28 118.5(3) . . ?
C29 C210 C211 118.7(4) . . ?
C212 C211 C210 120.5(4) . . ?
C213 C212 C211 120.0(4) . . ?
C212 C213 C214 120.8(4) . . ?
C213 C214 C29 118.5(4) . . ?
F14 P1 F16 90.96(16) . . ?
F14 P1 F12 91.24(16) . . ?
F16 P1 F12 90.71(17) . . ?
F14 P1 F11 89.79(16) . . ?
F16 P1 F11 179.18(16) . . ?
F12 P1 F11 88.94(17) . . ?
F14 P1 F15 90.08(15) . . ?
F16 P1 F15 89.86(17) . . ?
F12 P1 F15 178.55(16) . . ?
F11 P1 F15 90.47(17) . . ?
F14 P1 F13 178.99(17) . . ?
F16 P1 F13 89.76(15) . . ?
F12 P1 F13 89.46(15) . . ?
F11 P1 F13 89.50(15) . . ?
F15 P1 F13 89.22(14) . . ?
 
_diffrn_measured_fraction_theta_max    0.929
_diffrn_reflns_theta_full              25.00
_diffrn_measured_fraction_theta_full   0.929
_refine_diff_density_max    0.839
_refine_diff_density_min   -0.544
_refine_diff_density_rms    0.087
